# Supplementary material for: Adsorption site engineering: Cu–Ni(OH)2 sheets for efficient hydrogen evolution
Source: Royal Society of Chemistry journal article supplement (doi:10.1039/d1ta05941f), 2021-01-01
Supplement: d1ta05941f1.pdf [file d1ta05941f1.pdf]

## Supporting Information

### Adsorption sites engineering: Cu-Ni(OH)<sub>2</sub> sheet for Efficient Hydrogen Evolution

Wenda Zhong<sup>a</sup>, Chenfan Yang<sup>a</sup>, Jing Wu<sup>a</sup>, Wenli Xu<sup>b</sup>, Rong Zhao<sup>b</sup>, Hui Xiang<sup>b,\*</sup>, Ke Shen<sup>a,\*</sup>, and Xuanke Li<sup>a,b,\*</sup>

[\*] Prof. X. K. Li, [\*] Prof. K. Shen, [\*] Prof. H. Xiang, W. D. Zhong, C. F. Yang, J. Wu, W. L. Xu, R. Zhao

Hunan Province Key Laboratory for Advanced Carbon Materials and Applied Technology, College of Materials Science and Engineering, Hunan University, Changsha, Hunan 410082, China

E-mail: xkli8524@sina.com (Xuanke Li)

E-mail: shenk@hnu.edu.cn (Ke Shen)

Hubei Province Key Laboratory of Coal Conversion and New Carbon Materials, School of Chemistry and Chemical Engineering, Wuhan University of Science and Technology, Wuhan, Hubei 430081, China

E-mail: hxiang0717@163.com (Hui Xiang)

## Experimental Section

*Synthesis of Ni(OH)<sub>2</sub>/NF*: Nickel foam (NF) with an area of 3×3 cm<sup>2</sup> was ultrasonically washed with ethanol, hydrochloric acid (1 M), and ultrapure water for 10 minutes, respectively. Treated NF was then transferred into Teflon-lined stainless reactors (100 mL) containing 80 mL diluted hydrogen peroxide (4.5 wt%). After the hydrothermal oxidation reaction at 160 °C for 6 h., uniform plate-like Ni(OH)<sub>2</sub> arrays are generated on NF.

*Fabrication of Cu-Ni(OH)<sub>2</sub>/NF*: NF with an area of 3×3 cm<sup>2</sup> was ultrasonically washed with ethanol, hydrochloric acid (1 M), and ultrapure water for 10 minutes, respectively. Treated NF was then transferred into Teflon-lined stainless reactors (100 mL) containing 80 mL diluted hydrogen peroxide (4.5 wt%) and copper nitrate (0.01 mmol). After the hydrothermal reaction at 160 °C for 6 h., Cu-Ni(OH)<sub>2</sub> plates are generated on

NF. The Cu/Ni ratio of the Cu-Ni(OH)<sub>2</sub> plates is ascertained as about 1% by Inductively Coupled Plasma Optical Emission Spectrometer (ICP-OES). In our verification test, serial Cu-Ni(OH)<sub>2</sub>/NF samples are fabricated by controlled copper nitrate. ICP-OES measures the Cu/Ni ratios of the Cu-Ni(OH)<sub>2</sub> plates. Then, the integrated serial electrodes are denoted as Cu-Ni(OH)<sub>2</sub>/NF (0.5%), Cu-Ni(OH)<sub>2</sub>/NF (3%), and Cu-Ni(OH)<sub>2</sub>/NF (5%), respectively.

*Material characterizations:* The phase compositions of the samples are investigated by using X-ray diffraction (XRD, TD-3300) with Cu K $\alpha$  radiation at a scanning step of 5 °·min<sup>-1</sup>. Raman (DXR2) is also conducted to explore the structure of samples. UV-Vis Adsorption spectra obtained from Lambda750 PE. The specific surface area was measured by nitrogen adsorption isotherms (ASAP 2020, Micromeritics) based on Brunauer-Emmett-Teller (BET) model. Furthermore, scanning electron microscopy (SEM, Sigma HD) and transmission electron microscopy (TEM, Tecnai G2 F20 S) are used to study the catalysts' micro-morphology and atomic structure. Energy-dispersive X-ray spectroscopy (EDX) system attached to TEM and X-ray photoelectron spectroscopy (XPS, Thermo ESCALAB 250XI) systems is used to obtain the elemental composition and bonding characteristics of the catalysts. Ultraviolet photoelectron spectra (UPS) measurements are also carried out on ESCALAB 250. ICP-OES is measured by the Agilent 5110 ICP-OES.

*Electrochemical measurements:* We use Gamry Interface 1000E electrochemical workstation to perform all the electrochemical tests using a standard three-electrode cell, where the self-supporting catalysts are used as the working electrodes, and

Hg/HgO and carbon rod are used as reference and counter electrodes, respectively. The commercial Pt/C catalyst (20 wt%) adheres to nickel foam with the same loading (0.9 mg cm<sup>2</sup>) as the comparison sample. Linear sweep voltammetry (LSV) measurements are conducted in a 1M KOH electrolyte. The stability of the catalyst is evaluated by using chronoamperometry. The Tafel slopes are obtained from the LSV plots with a scan rate of 5 mV s<sup>-1</sup>. All polarization curves are subjected to *iR* compensation. All the potentials are calibrated with respect to a reversible hydrogen electrode (RHE) by adding a value of 0.926 V. Electrochemical impedance spectroscopy (EIS) has been conducted at 100 mV with a 5 mV AC potential from 100 000 to 0.01 Hz.

#### **Electrochemical Measurements:**

The electrochemical surface area (ECSA) is estimated by cyclic voltammogram (CV) in a small potential range at the different scan rates of 20, 40, 60, 80, and 100 mV s<sup>-1</sup>. The current density differences are plotted against scan rates, and the linear slope is twice the double-layer capacitance (*C<sub>dl</sub>*). Moreover, the roughness factor (*R<sub>f</sub>*) is calculated by the following equation:  $R_f = C_{dl}/C_o$ , in which *C<sub>o</sub>* is the capacitance of ideal planar metal oxides with smooth surfaces (0.040 mF cm<sup>-2</sup>). ECSA can be calculated from *C<sub>dl</sub>* using the specific capacitance value for a flat standard with 1 cm<sup>2</sup> of the whole surface area. Herein, the NF is used as the standard. ECSA is calculated as follows:

$$A_{\text{ECSA}}^{\text{catalyst}} = \frac{C_{\text{dl}}^{\text{catalyst}} (\text{mF cm}^{-2})}{C_{\text{dl}}^{\text{NF}} (\text{mF cm}^{-2}) \text{ per cm}_{\text{ECSA}}^2}$$

## Computational configurations

In this work, we used first-principles calculations based on the density function theory (DFT) as implemented in the Vienna Abinitio Simulation Package (VASP) with Projector Augmented Wave (PAW) method.<sup>1</sup> And the exchange-correlation energy is described by the functional of Perdew-Burke-Ernzerhof (PBE) from including van der Waals corrections (DFT-D3 method). The kinetic energy cutoff of electron wave functions is 500 eV. The geometry optimizations are performed by using the conjugated gradient method, and the convergence threshold is set to be  $10^{-4}$  eV in energy and  $0.01\text{eV \AA}^{-1}$  in force. A vacuum layer of 15 Å is applied for all calculated models.<sup>2</sup> CI-NEB (climbing image nudged elastic band) was used for the transition state searching. Brillouin zone was sampled by a  $3\times 1\times 1$  k-points grid for the structure optimizations and  $3\times 3\times 1$  were employed for the density of states (DOS) calculations, respectively. The Adsorption energy of  $\text{H}_2\text{O}$  was calculated as follows,  $\Delta E_{\text{H}_2\text{O}} = E_{\text{surf-H}_2\text{O}} - E_{\text{surf}} - E_{\text{H}_2\text{O}}$ , in which  $E_{\text{surf-H}_2\text{O}}$  is the total energies of the surface covered with  $\text{H}_2\text{O}$  molecule and  $E_{\text{surf}}$  without  $\text{H}_2\text{O}$  molecule, and  $E_{\text{H}_2\text{O}}$  is the energy of free  $\text{H}_2\text{O}$  molecule. The free energies are determined by the following formula  $\Delta G = \Delta E + \Delta ZPE - T\Delta S$ , where  $\Delta E$ ,  $\Delta ZPE$ , and  $\Delta S$  represent the binding energy, zero-point energy change, and entropy change of the adsorption of adsorbates, respectively. The related zero-point energies and entropies of  $\text{H}_2$ ,  $\text{H}_2\text{O}$ ,  $\text{H}^*$ , and  $\text{OH}^*$  are from previous literature.<sup>3,4</sup>

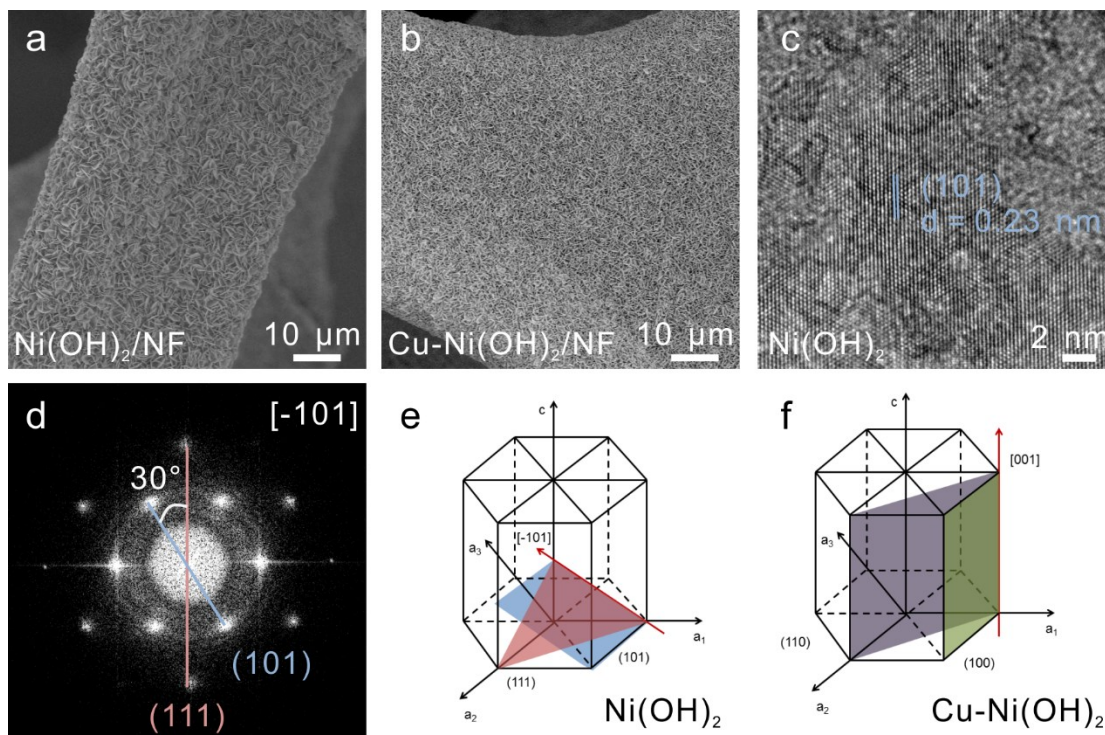

**Fig. S1.** SEM images of (a)  $\text{Ni(OH)}_2/\text{NF}$  and (b)  $\text{Cu-Ni(OH)}_2/\text{NF}$ . (c) HR-TEM image and (d) corresponding SAED image of individual  $\text{Ni(OH)}_2$  plate. Corresponding zone axis of (e)  $\text{Ni(OH)}_2$  and (f)  $\text{Cu-Ni(OH)}_2$ .

**Table S1.** Specific surface areas

| Sample                         | BET Surface                       |
|--------------------------------|-----------------------------------|
| NF                             | $0.26 \text{ m}^2 \text{ g}^{-1}$ |
| $\text{Ni(OH)}_2/\text{NF}$    | $0.59 \text{ m}^2 \text{ g}^{-1}$ |
| $\text{Cu-Ni(OH)}_2/\text{NF}$ | $0.89 \text{ m}^2 \text{ g}^{-1}$ |

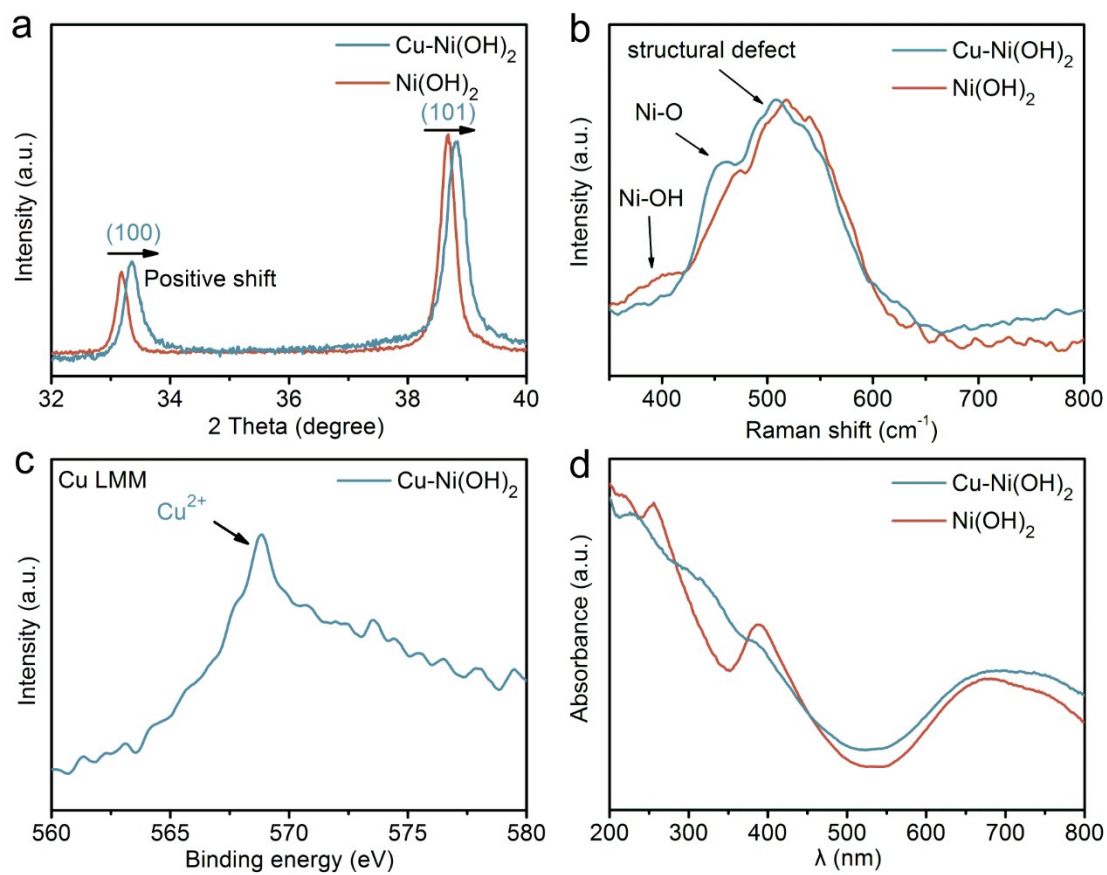

**Fig. S2.** (a) Enlarged XRD patterns of Cu-Ni(OH)<sub>2</sub> and Ni(OH)<sub>2</sub>. (b) Raman patterns of Cu-Ni(OH)<sub>2</sub> and Ni(OH)<sub>2</sub>. (c) The Cu LMM auger spectrum of Cu-Ni(OH)<sub>2</sub>. (d) UV-Vis Adsorption spectra of Cu-Ni(OH)<sub>2</sub> and Ni(OH)<sub>2</sub>.

**Table S2.** Binding energy values from XPS spectra and corresponding Content.

| Sample                 | B.E.(eV)                   | Content (%)   |
|------------------------|----------------------------|---------------|
| Ni(OH) <sub>2</sub>    | (Ni <sup>2+</sup> ) 855.45 | (Ni 2p) 37.14 |
|                        | (Ni <sup>3+</sup> ) 856.92 | (Ni 2p) 15.05 |
|                        | (Sat. 1) 861.39            | (Ni 2p) 43.20 |
|                        | (Sat. 2) 866.09            | (Ni 2p) 4.61  |
|                        | (Ni-OH) 531.02             | (O 1s) 94.66  |
|                        | (adsorbent) 532.47         | (O 1s) 5.34   |
| Cu-Ni(OH) <sub>2</sub> | (Ni <sup>2+</sup> ) 855.33 | (Ni 2p) 38.00 |
|                        | (Ni <sup>3+</sup> ) 856.90 | (Ni 2p) 13.82 |
|                        | (Sat. 1) 861.27            | (Ni 2p) 43.14 |
|                        | (Sat. 2) 865.96            | (Ni 2p) 5.04  |
|                        | (Ni-OH) 530.84             | (O 1s) 88.74  |
|                        | (adsorbent) 532.03         | (O 1s) 11.26  |
|                        | (Cu <sup>+</sup> ) 932.73  | (Cu 2p) 9.83  |
|                        | (Cu <sup>2+</sup> ) 934.32 | (Cu 2p) 56.27 |
|                        | (Sat. 1) 941.12            | (Cu 2p) 23.45 |
| (Sat. 2) 943.69        | (Cu 2p) 10.45              |               |

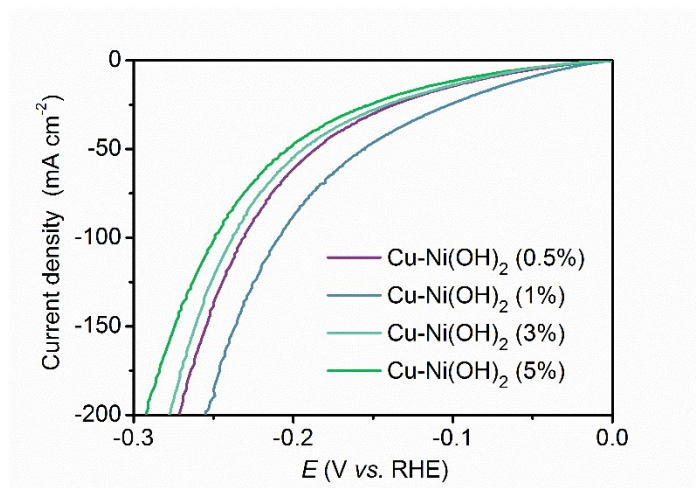

**Fig. S3.** Polarization curves of serial Cu-Ni(OH)<sub>2</sub>/NF samples.

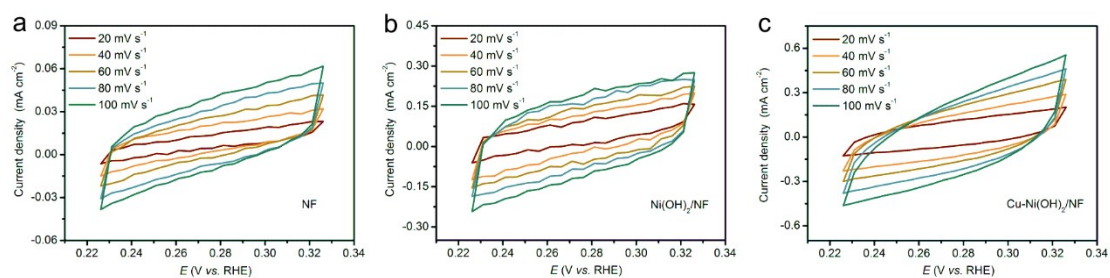

**Fig. S4.** (a-c) CV curves of NF, Ni(OH)<sub>2</sub>/NF, and Cu-Ni(OH)<sub>2</sub>/NF for ECSA and  $R_f$  evaluations.

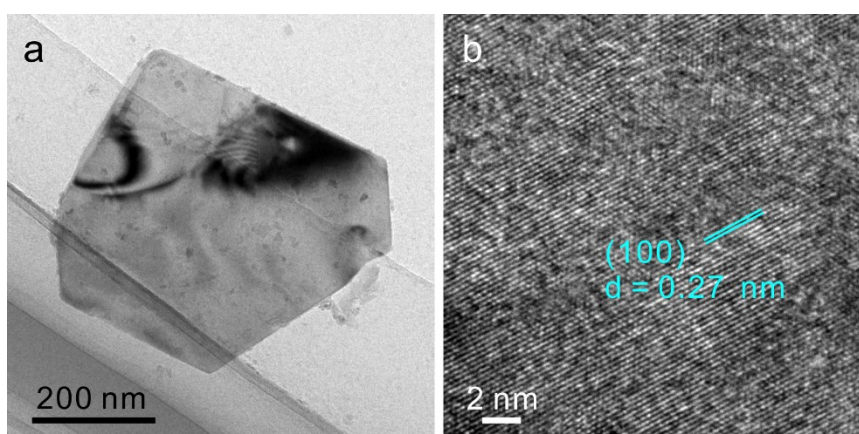

**Fig. S5** The (a) TEM and (b) HRTEM images of Cu-Ni(OH)<sub>2</sub> after the stability test.



**Table S3.** Comparisons of HER activity of the Cu-Ni(OH)<sub>2</sub>/NF with some representative HER electrocatalysts recently reported in alkaline media.

| Catalyst                                          | Overpotential for<br>10 mA cm <sup>-2</sup> (mV)  | Tafel slope<br>(mV dec <sup>-1</sup> ) | Reference        |
|---------------------------------------------------|---------------------------------------------------|----------------------------------------|------------------|
| <b>Cu-Ni(OH)<sub>2</sub>/NF</b>                   | <b>53</b><br><b>209 (<math>\eta_{100}</math>)</b> | <b>51</b>                              | <b>This work</b> |
| NiFe LDH/NF                                       | 59                                                | 62                                     | 5                |
| Ni-Ni(OH) <sub>2</sub> /NF                        | 72                                                | 43                                     | 6                |
| Ni(OH) <sub>2</sub> -Fe <sub>2</sub> P/Ti<br>mesh | 76                                                | 105                                    | 7                |
| CoMnS@NiO/CC                                      | 125                                               | 147                                    | 8                |
| Fe-Ni(OH) <sub>2</sub> /NF                        | 138                                               | 63                                     | 9                |
| Ni/NiO/NF                                         | 120                                               | 114                                    | 10               |
| Ni <sub>8</sub> P <sub>3</sub> /NF                | 130                                               | 58                                     | 11               |
| NiCo LDH/CC                                       | 367                                               | 40                                     | 12               |
| NiCoS/Ti foil                                     | 88                                                | 118                                    | 13               |

**Table S4.** Corresponding results of ESCA and Roughness Factor.

| Sample                     | ESCA<br>(cm <sup>2</sup> ) | Roughness Factor |
|----------------------------|----------------------------|------------------|
| NF                         | 1.0                        | 6.5              |
| Ni(OH) <sub>2</sub> /NF    | 5.2                        | 34.0             |
| Cu-Ni(OH) <sub>2</sub> /NF | 8.4                        | 54.3             |

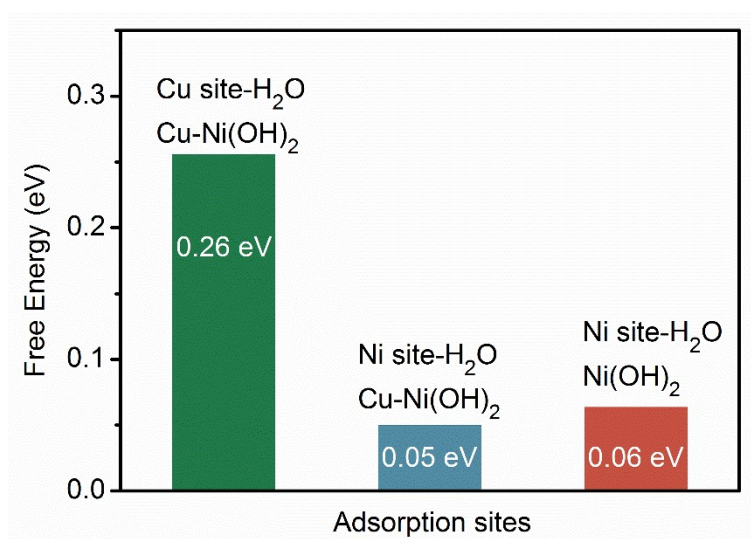

**Fig. S6** Free energy of water molecule adsorption on different sites.

**Table S5.** The calculated free energies diagram.

| Structure                                     | $\Delta G$ (eV) |
|-----------------------------------------------|-----------------|
| Ni(OH) <sub>2</sub> -H <sub>2</sub> O*        | 0.06            |
| Ni(OH) <sub>2</sub> -Ts*                      | 2.73            |
| Ni(OH) <sub>2</sub> -H*                       | 0.49            |
| Cu-Ni(OH) <sub>2</sub> (I)-H <sub>2</sub> O*  | 0.11            |
| Cu-Ni(OH) <sub>2</sub> (I)-Ts* (Ni-H)         | 2.33            |
| Cu-Ni(OH) <sub>2</sub> -H* (Ni-H)             | 0.28            |
| Cu-Ni(OH) <sub>2</sub> (II)-H <sub>2</sub> O* | 0.05            |
| Cu-Ni(OH) <sub>2</sub> (II)-Ts* (Cu-H)        | 2.59            |
| Cu-Ni(OH) <sub>2</sub> -H* (Cu-H)             | 1.57            |

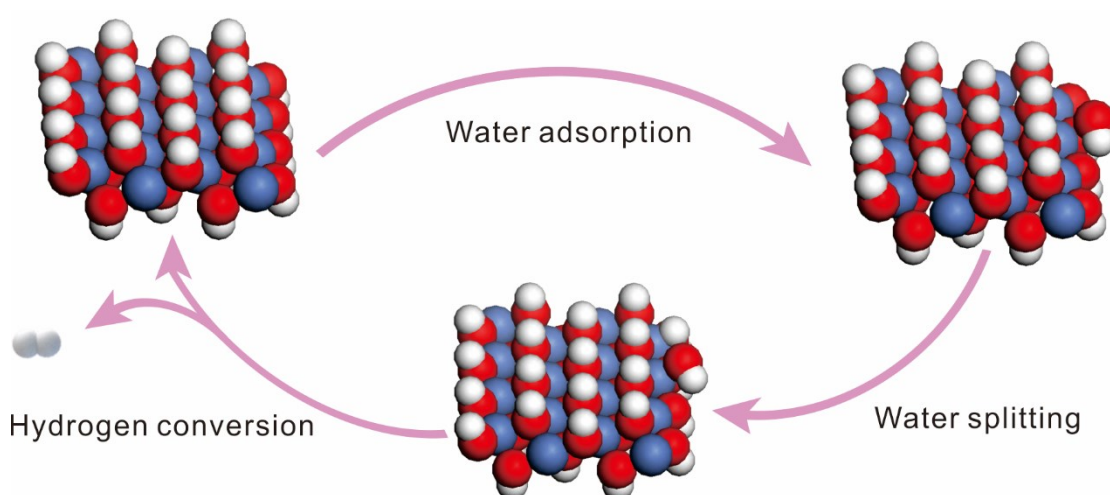

**Fig. S7** The HER reaction pathway on Ni(OH)<sub>2</sub>. Color scheme: white, H; red, O; blue, Ni.

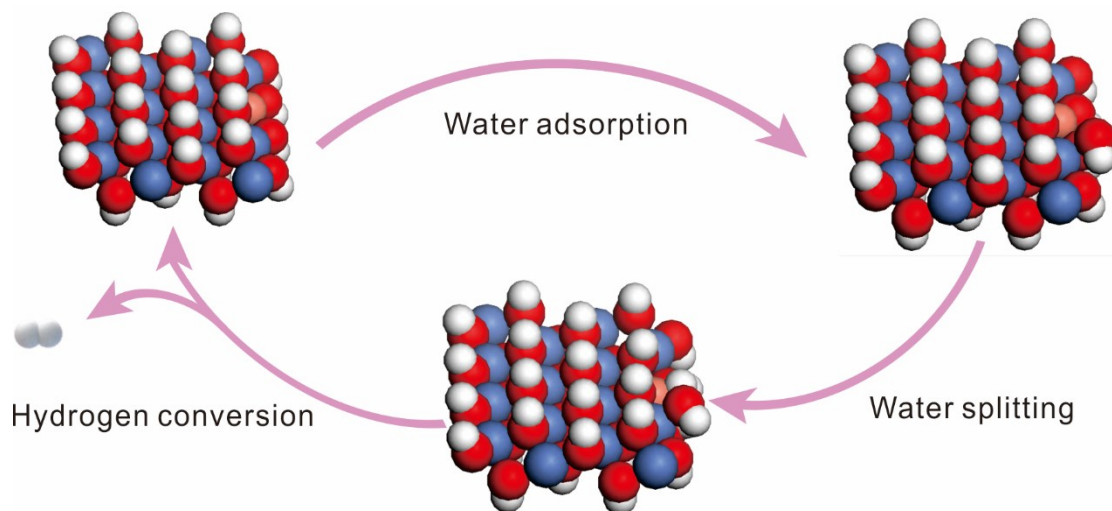

**Fig. S8** The HER reaction pathway on Cu-Ni(OH)<sub>2</sub> (II). Color scheme: white, H; red, O; blue, Ni.

## References:

- 1 Z. Jiang, X. Gu, L. Wang and L. Huang, *Chem. Phys. Lett.*, 2016, **659**, 230–233.
- 2 H. Xu, J. Wan, H. Zhang, L. Fang, L. Liu, Z. Huang, J. Li, X. Gu and Y. Wang, *Adv. Energy Mater.*, 2018, **8**, 1–7.
- 3 Z. Xing, L. Gan, J. Wang and X. Yang, *J. Mater. Chem. A*, 2017, **5**, 7744–7748.
- 4 M. J. Kolb, F. Calle-Vallejo, L. B. F. Jurlink and M. T. M. Koper, *J. Chem. Phys.*, 2014, **140**, 134708.
- 5 Z. Qiu, C.-W. Tai, G. A. Niklasson and T. Edvinsson, *Energy Environ. Sci.*, 2019, **12**, 572–581.
- 6 W. Zhong, W. Li, C. Yang, J. Wu, R. Zhao, M. Idrees, H. Xiang, Q. Zhang and X. Li, *J. Energy Chem.*, , DOI:10.1016/j.jechem.2021.02.013.
- 7 X. Zhang, S. Zhu, L. Xia, C. Si, F. Qu and F. Qu, *Chem. Commun.*, 2018, **54**, 1201–1204.
- 8 Q. Li, Z. Xing, D. Wang, X. Sun and X. Yang, *ACS Catal.*, 2016, **6**, 2797–2801.
- 9 J.-T. Ren, G.-G. Yuan, C.-C. Weng, L. Chen and Z.-Y. Yuan, *Nanoscale*, 2018, **10**, 10620–10628.
- 10 Y. Kuang, G. Feng, P. Li, Y. Bi, Y. Li and X. Sun, *Angew. Chemie Int. Ed.*, 2016, **55**, 693–697.
- 11 G.-F. Chen, T. Y. Ma, Z.-Q. Liu, N. Li, Y.-Z. Su, K. Davey and S.-Z. Qiao, *Adv. Funct. Mater.*, 2016, **26**, 3314–3323.

- 12 H. Liang, F. Meng, M. Cabán-Acevedo, L. Li, A. Forticaux, L. Xiu, Z. Wang and S. Jin, *Nano Lett.*, 2015, **15**, 1421–1427.
- 13 Z. Peng, D. Jia, A. M. Al-Enizi, A. A. Elzatahry and G. Zheng, *Adv. Energy Mater.*, 2015, **5**, 1402031.
